# Supplementary material
Source: HighWire-hosted journal article supplement (https://bmjopen.bmj.com/content/6/3/e010128)
Supplement: inline-supplementary-material-1 [file inline-supplementary-material-1.pdf]

## WEB ONLY TABLES

Web only table 1 – Expected and observed SDA cases of STD in the cohort during 1977 to 2009

|                       | Gender | Age group | Expected | Observed | $\chi^2$ | Fisher    | SIR (CI 95%)     |
|-----------------------|--------|-----------|----------|----------|----------|-----------|------------------|
| Chlamydia and related | Male   | 0-19      | 0.1      | 0        | 5.69     | p < 0.01  | 0.26 (0.01-1.47) |
|                       |        | 20-39     | 2.9      | 1        |          |           |                  |
|                       |        | 40-59     | 0.6      | 0        |          |           |                  |
|                       |        | 60-79     | 0.2      | 0        |          |           |                  |
|                       |        | 80-       | 0.0      | 0        |          |           |                  |
|                       | Female | 0-19      | 1.3      | 0        | 16.78    | p < 0.001 | 0.1 (0.00-0.56)  |
|                       |        | 20-39     | 7.0      | 1        |          |           |                  |
|                       |        | 40-59     | 1.2      | 0        |          |           |                  |
|                       |        | 60-79     | 0.3      | 0        |          |           |                  |
|                       |        | 80-       | 0.1      | 0        |          |           |                  |
| Gonorrhea             | Male   | 0-19      | 0.0      | 0        |          |           | 0                |
|                       |        | 20-39     | 0.5      | 0        |          |           |                  |
|                       |        | 40-59     | 0.2      | 0        |          |           |                  |
|                       |        | 60-79     | 0.1      | 0        |          |           |                  |
|                       |        | 80-       | 0.0      | 0        |          |           |                  |
|                       | Female | 0-19      | 0.5      | 0        |          |           | 0                |
|                       |        | 20-39     | 1.9      | 0        |          |           |                  |
|                       |        | 40-59     | 0.2      | 0        |          |           |                  |
|                       |        | 60-79     | 0.0      | 0        |          |           |                  |
|                       |        | 80-       | 0.0      | 0        |          |           |                  |
| Syphilis              | Male   | 0-19      | 0.0      | 0        |          |           | 0                |
|                       |        | 20-39     | 0.3      | 0        |          |           |                  |
|                       |        | 40-59     | 0.3      | 0        |          |           |                  |
|                       |        | 60-79     | 0.3      | 0        |          |           |                  |
|                       |        | 80-       | 0.1      | 0        |          |           |                  |
|                       | Female | 0-19      | 0.0      | 0        |          |           | 0                |
|                       |        | 20-39     | 0.3      | 0        |          |           |                  |
|                       |        | 40-59     | 0.2      | 0        |          |           |                  |
|                       |        | 60-79     | 0.4      | 0        |          |           |                  |
|                       |        | 80-       | 0.2      | 0        |          |           |                  |

Web only table 2 – Expected and observed Baptist cases of STD in the cohort during 1977 to 2009

|                       | Gender | Age group | Expected | Observed | $\chi^2$ | Fisher  | SIR (CI 95%)     |
|-----------------------|--------|-----------|----------|----------|----------|---------|------------------|
| Chlamydia and related | Male   | 0-19      | 0.0      | 0        | 4.02     | < 0.05  | 0.36 (0.01-1.99) |
|                       |        | 20-39     | 2.1      | 1        |          |         |                  |
|                       |        | 40-59     | 0.5      | 0        |          |         |                  |
|                       |        | 60-79     | 0.2      | 0        |          |         |                  |
|                       |        | 80-       | 0.0      | 0        |          |         |                  |
|                       | Female | 0-19      | 0.3      | 0        | 12.54    | < 0.001 | 0.75 (0.24-1.74) |
|                       |        | 20-39     | 5.1      | 1        |          |         |                  |
|                       |        | 40-59     | 1.1      | 3        |          |         |                  |
|                       |        | 60-79     | 0.2      | 1        |          |         |                  |
|                       |        | 80-       | 0.0      | 0        |          |         |                  |
| Gonorrhea             | Male   | 0-19      | 0.0      | 0        |          |         | 0                |
|                       |        | 20-39     | 0.3      | 0        |          |         |                  |
|                       |        | 40-59     | 0.2      | 0        |          |         |                  |
|                       |        | 60-79     | 0.1      | 0        |          |         |                  |
|                       |        | 80-       | 0.0      | 0        |          |         |                  |
|                       | Female | 0-19      | 0.1      | 0        | 2.14     | 0.20    | 0.63 (0.02-3.48) |
|                       |        | 20-39     | 1.4      | 1        |          |         |                  |
|                       |        | 40-59     | 0.1      | 0        |          |         |                  |
|                       |        | 60-79     | 0.0      | 0        |          |         |                  |
|                       |        | 80-       | 0.0      | 0        |          |         |                  |
| Syphilis              | Male   | 0-19      | 0.0      | 0        |          |         | 0                |
|                       |        | 20-39     | 0.2      | 0        |          |         |                  |
|                       |        | 40-59     | 0.3      | 0        |          |         |                  |
|                       |        | 60-79     | 0.3      | 0        |          |         |                  |
|                       |        | 80-       | 0.1      | 0        |          |         |                  |
|                       | Female | 0-19      | 0.0      | 0        |          |         | 0                |
|                       |        | 20-39     | 0.2      | 0        |          |         |                  |
|                       |        | 40-59     | 0.2      | 0        |          |         |                  |
|                       |        | 60-79     | 0.3      | 0        |          |         |                  |
|                       |        | 80-       | 0.1      | 0        |          |         |                  |
